# Supplementary material for: Epitranscriptome profiling of spleen mRNA m6A methylation reveals pathways of host responses to malaria parasite infection
Source: PubMed Central journal article supplement (PMC9531237; doi:10.3389/fimmu.2022.998756), 2022-09-20
Supplement: DataSheet_1.pdf [file DataSheet_1.pdf]

## SUPPLEMENTAL MATERIAL

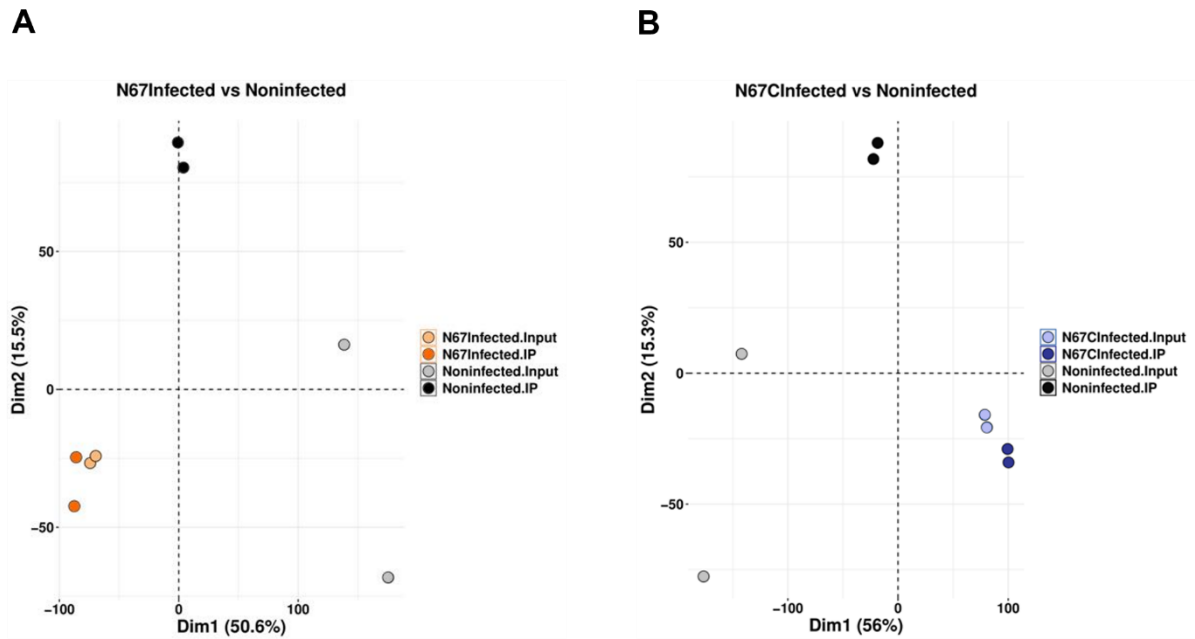

**Fig. S1.** Principal component analysis of input and IP samples from *Plasmodium* N67- or N67C-infected and noninfected spleens. (A) N67-infected mice spleens compared to noninfected mice spleens. (B) N67C-infected mice spleens compared to noninfected mice spleens. The eigenvalues of the top two PCs are shown; PC1 explains 50.6% and 56.0% of variance for N67- and N67C-samples, respectively; PC2 explains 15.5% and 15.3% of variance explained for N67- and N67C-samples, respectively.

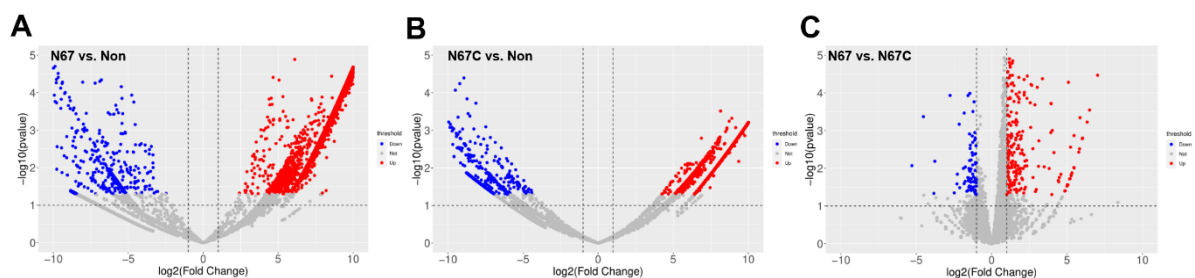

**Fig. S2.** Volcano plot showing up- (in red) and down-regulated (in blue) genes between different groups. (A) Comparison between N67-infected and noninfected samples. (B) Comparison between N67C-infected and noninfected samples. (C) Comparison between N67-infected and N67C-infected samples.

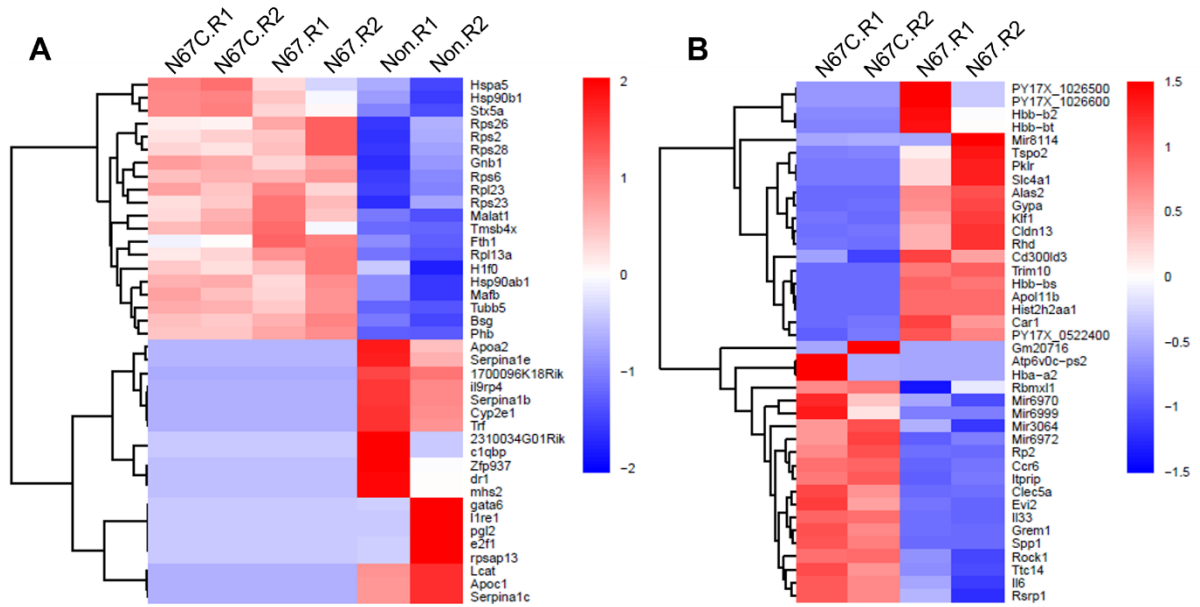

**Fig. S3.** Heat maps showing gene expression patterns in different groups of biological replicates. (A) The comparisons among N67-, N67C-infected and noninfected spleens. (B) The comparison between N67- and N67C-infected spleens. The expression level is indicated by red (high) and blue (low), respectively. Shown are the top 20 differentially expressed genes.

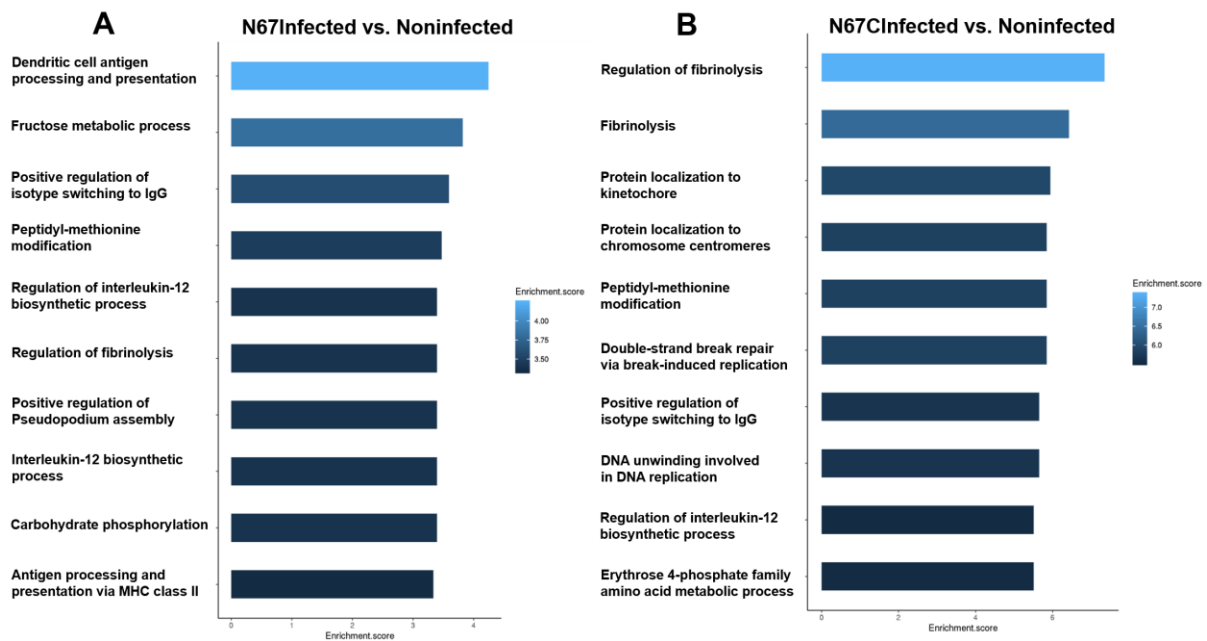

**Fig. S4.** Gene Ontology enrichment analysis reveals the pathways related to differentially expressed genes between groups. (A) Biological processes-related to differentially expressed genes in N67-infected mice spleens compared to noninfected mice spleens. (B) Biological processes related to differentially expressed genes in N67C-infected mice spleens compared to noninfected mice spleens. Shown are the top 10 enriched pathways.

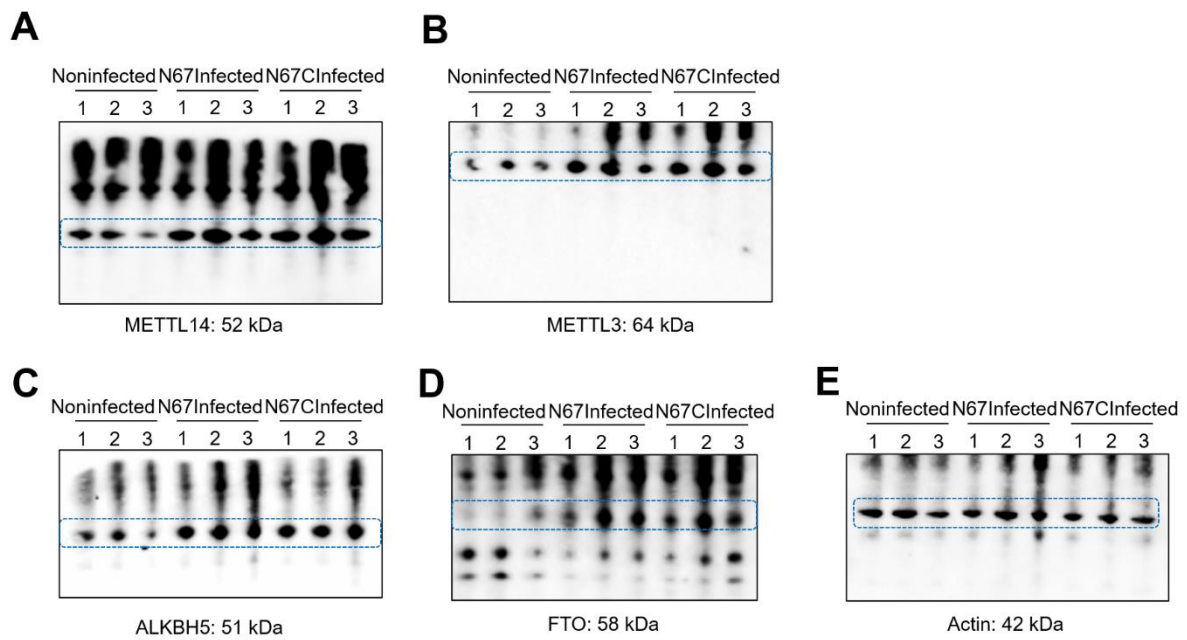

**Fig. S5.** Uncropped western blots of m<sup>6</sup>A machinery protein levels in noninfected, N67- or N67C-infected mice spleens. (A) m<sup>6</sup>A writer protein METTL14. (B) m<sup>6</sup>A writer protein METTL3. (C) m<sup>6</sup>A eraser protein ALKBH5. (D) m<sup>6</sup>A eraser protein FTO. (E)  $\beta$ -actin was used as the loading control.
